# Supplementary material
Source: PubMed Central journal article supplement (PMC8666463)
Supplement: NIHMS1717536-supplement-1.pdf [file NIHMS1717536-supplement-1.pdf]

## Supplemental Tables:

### Table S1. Swallow type and peristaltic classification on high-resolution

manometry (HRM). Each of the ten supine liquid test swallows was assigned a swallow type and then cumulative proportions of each were applied to designate a peristaltic or contractility classification. Normal, weak, and hypercontractile swallows all with distal latency (DL) >4.5 seconds. DCI – distal contractile integral.

|                                                                            | Definition                                                                                                                                                         |
|----------------------------------------------------------------------------|--------------------------------------------------------------------------------------------------------------------------------------------------------------------|
| <b>Swallow type</b>                                                        |                                                                                                                                                                    |
| <b>Normal</b>                                                              | <ul style="list-style-type: none"> <li>• DCI 450-8,000 mmHg•s•cm without peristaltic break &gt;5cm</li> </ul>                                                      |
| <b>Ineffective:</b>                                                        |                                                                                                                                                                    |
| <ul style="list-style-type: none"> <li>• Weak</li> <li>• Failed</li> </ul> | <ul style="list-style-type: none"> <li>• DCI 100-450 mmHg•s•cm or DCI &gt;450 mmHg•s•cm with peristaltic break &gt;5cm</li> <li>• DCI &lt;100 mmHg•s•cm</li> </ul> |
| <b>Hypercontractile</b>                                                    | <ul style="list-style-type: none"> <li>• DCI &gt;8,000 mmHg•s•cm</li> </ul>                                                                                        |
| <b>Premature</b>                                                           | <ul style="list-style-type: none"> <li>• DL &lt;4.5 seconds with DCI &gt;450 mmHg•s•cm</li> </ul>                                                                  |
| <i>////</i>                                                                | <i>////</i>                                                                                                                                                        |
| <b>Peristaltic / contractile classification</b>                            |                                                                                                                                                                    |
| <b>Absent contractility</b>                                                | <ul style="list-style-type: none"> <li>• 100% failed peristalsis</li> </ul>                                                                                        |
| <b>Ineffective esophageal motility</b>                                     | <ul style="list-style-type: none"> <li>• &gt;70% ineffective swallows or ≥50% failed swallows</li> </ul>                                                           |
| <b>Hypercontractile</b>                                                    | <ul style="list-style-type: none"> <li>• ≥20% hypercontractile swallows</li> </ul>                                                                                 |
| <b>Spasm</b>                                                               | <ul style="list-style-type: none"> <li>• ≥20% premature swallows</li> </ul>                                                                                        |
| <b>Normal peristalsis</b>                                                  | <ul style="list-style-type: none"> <li>• Not meeting above criteria</li> </ul>                                                                                     |

**Table S2. Association of endoscopy sedation strategy on FLIP Panometry**

**contractile response pattern.** Each of the ten supine liquid high-resolution manometry (HRM) test swallows was assigned a swallow type and then cumulative proportions of each were applied to designate a peristaltic or contractility classification per Table S1.

MAC = monitored Anesthesia Care.

| HRM-peristalsis pattern | Sedation strategy | FLIP Panometry Contractile Response Pattern |            |                     |          |                  | P-value |
|-------------------------|-------------------|---------------------------------------------|------------|---------------------|----------|------------------|---------|
|                         |                   | Normal                                      | Borderline | Impaired-disordered | Absent   | Spastic-reactive |         |
| Normal                  | Conscious, n (%)  | 88 (35)                                     | 77 (30)    | 54 (21)             | 15 (6)   | 20 (8)           | 0.102   |
|                         | MAC, n (%)        | 4 (11)                                      | 12 (33)    | 12 (33)             | 6 (17)   | 2 (6)            |         |
| Ineffective             | Conscious, n (%)  | 7 (14)                                      | 12 (23)    | 16 (31)             | 12 (23)  | 5 (10)           | 0.407   |
|                         | MAC, n (%)        | 0                                           | 6 (25)     | 10 (42)             | 5 (21)   | 3 (13)           |         |
| Absent                  | Conscious, n (%)  | 0                                           | 5 (3)      | 41 (26)             | 104 (65) | 10 (6)           | 0.544   |
|                         | MAC, n (%)        | 0                                           | 1 (2)      | 10 (17)             | 43 (74)  | 4 (7)            |         |
| Spasm                   | Conscious, n (%)  | 6 (8)                                       | 8 (11)     | 32 (44)             | 6 (8)    | 20 (28)          | 0.645   |
|                         | MAC, n (%)        | 0                                           | 3 (14)     | 9 (43)              | 3 (14)   | 6 (29)           |         |
| Hypercontractile        | Conscious, n (%)  | 1 (5)                                       | 6 (29)     | 5 (24)              | 4 (19)   | 24 (3)           | 0.331   |
|                         | MAC, n (%)        | 2 (25)                                      | 2 (25)     | 1 (13)              | 0        | 3 (38)           |         |
